1 **Prevalence of plasmodium infection and associated risk factors among household members**  
2 **in Southern Ethiopia: Multi-site cross-sectional study**

3

4 Girma Yutura<sup>1</sup>, Fekadu Massebo<sup>2</sup>, Nigatu Eligo<sup>2</sup>, Abena Kochora<sup>3</sup>, Teklu Wegayehu<sup>2\*</sup>

5

6

7 <sup>1</sup>Malaria and Neglected Tropical Diseases, Gorche Health District, Sidama Regional State,  
8 Hawassa, Ethiopia

9 <sup>2</sup>Department of Biology, College of Natural and Competitional Sciences, Arba Minch University,  
10 Arba Minch, Ethiopia.

11 <sup>3</sup>Malaria and Neglected Tropical Diseases, Armauer Hansen Research Institute, Addis Ababa,  
12 Ethiopia

13

14 **Email address**

15 Girma Yutura, GY: [girmayutura@gmail.com](mailto:girmayutura@gmail.com)

16 Fekadu Massebo, FM: [fekadu.massebo@amu.edu.et](mailto:fekadu.massebo@amu.edu.et)

17 Nigatu Eligo, NE: [nigatu.eligo@amu.edu.et](mailto:nigatu.eligo@amu.edu.et)

18 Abena Kochora, AK: [abenakochora@gmail.com](mailto:abenakochora@gmail.com)

19 Teklu Wegayehu, TW: [tekluweg2007@yahoo.com](mailto:tekluweg2007@yahoo.com)

20

21

22 \*Corresponding Authors

23 E-mail: [tekluweg2007@yahoo.com](mailto:tekluweg2007@yahoo.com)

24

## 25 **Abstract**

26 Despite continuous prevention and control strategies in place, malaria remains a major public  
27 health problem in sub-Saharan Africa including Ethiopia. This study is, therefore, aimed to  
28 determine the prevalence of plasmodium infection and associated risk factors in selected rural  
29 *kebeles* in southern Ethiopia. A community-based cross-sectional study was conducted between  
30 January and June 2019. Multi-stage sampling techniques were employed to select the study districts  
31 and *kebeles* from four zones. Blood sample were taken from 1674 participants by finger prick and  
32 thin and thick smears were examined by microscopy. Socio-demographic data as well as risk factors  
33 for malaria infection were collected using questionnaires. Bivariate and multivariate logistic  
34 regressions were used to analyze the data. The overall prevalence of malaria in the study localities  
35 was 4.5% (76/1674). The prevalence was varied among the study localities with high prevalence in  
36 Bashilo (14.6%; 33/226) followed by Mehal Korga (12.1%; 26/214). *Plasmodium falciparum* was  
37 the dominant parasite accounted for 65.8% (50/76), while *P. vivax* accounted 18.4% (14/76). Co-  
38 infection of *P. falciparum* and *P. vivax* was 15.8% (12/76). The prevalence of malaria was 7.8%  
39 (27/346) in age less than 5 years and 7.5% (40/531) in 5-14 years. The age groups >14years were  
40 less likely infected with plasmodium parasite (AOR=0.14, 95% CI 0.02-0.82). Asymptomatic  
41 individuals more likely had malaria infection (AOR = 28.4, 95% CI 011.4-70.6). Individuals living  
42 proximity to mosquito breeding sites have higher malaria infection (AOR = 6.17, 95% CI 2.66 -  
43 14.3). Malaria remains a public health problem in the study localities with lower age group and  
44 asymptomatic individuals had higher plasmodium infection. Thus, malaria prevention and control  
45 strategies targeting children and asymptomatic cases are crucial to reduce malaria related morbidity  
46 and mortality.

47 **Keywords/phrases:** Asymptomatic, Malaria, *Plasmodium*, Risk factors, Southern Ethiopia

## 48 **Introduction**

49 Malaria is a life-threatening disease that causes morbidity and mortality worldwide. Globally,  
50 estimated 228 million cases 87 endemic countries reported in 2018 [1]. African regions particularly  
51 sub-Saharan Africa shares the highest burden of cases. The endeavor of malaria intervention  
52 strategies brought significant results in the past years. However, a total of 247 million cases reported  
53 in 2021 which is increased from 245 million in 2020 [2]. Between 2000 and 2019 the incidence of  
54 malaria cases decreased by 82 to 57 before increasing to 59 in 2020 [2]. Although malaria cases  
55 and deaths declined in last decades, there is slight increase in malaria cases and deaths and malaria  
56 remains a major public health problem putting approximately half world population at risk of  
57 infection [2, 3].

58 Five species of plasmodium namely *P. falciparum*, *P. vivax*, *P. ovale*, *P. malariae* and *P. knowlesi*  
59 cause disease in humans [4]. Of these, *P. falciparum* and *P. vivax* are distributed worldwide.  
60 *Plasmodium falciparum* infection dominates in Africa, while *P. vivax* is prevalent in Asia [5]. The  
61 two species are also the major causes of morbidity and mortality in Ethiopia. Despite the country's  
62 long history of malaria control which dates back to the 1950s, the disease persistent to causes a  
63 significant threat [6].

64 Malaria transmission is often seasonal, variable, and bimodal in Ethiopia. It affects two-thirds of  
65 landmass, and more than 60 million people live in malaria-risk areas. *Plasmodium falciparum* and  
66 *P. vivax* accounting to 60% and 40% of the disease in the country [7, 8]. *Plasmodium falciparum*  
67 is highly virulent species which causes severe malaria and death in the country [9, 10]. In Ethiopia  
68 there were 904,495 malaria cases and 213 deaths in 2019. *Plasmodium falciparum* caused most  
69 morbidity, with 724,996 (80%) followed by *P. vivax* 166,340 (18.4%) and 13,159 (1.5%),  
70 respectively [11].

71 The implementation of malaria preventive and control measures in Ethiopia, as in other areas of the  
72 world, has decreased malaria morbidity, death, and economic loss. In the fight against the disease,  
73 the distribution of long-lasting insecticide-treated bed nets (LLINs) and indoor residual spraying  
74 are critical. Additionally, increased healthcare utilization, early diagnosis, prompt treatment,  
75 prevention, rapid management of malaria epidemics, and disease surveillance were among the  
76 interventions used. Malaria prevention and control services have been provided free of charge in  
77 the country. Ethiopia is currently working on a malaria elimination program that aims to eradicate  
78 the disease by 2030 [12,13].

79 In the former South Nations Nationalities Peoples Regional State (SNNPRs) of Ethiopia, about 26%  
80 of the population is at risk and 65% of the area is malarious. The disease causes morbidity and  
81 mortality in the region [14]. The epidemiology of malaria is heavily influenced by altitude, season,  
82 climatic conditions, vector feeding behavior, socio-economic status, insecticide resistance status of  
83 vectors, antimalarial drug resistance status of plasmodium parasites, and the success of management  
84 methods. Hence, understanding the epidemiology of malaria at different geographical areas has  
85 public health implications. Therefore, the aim of this study was to assess the prevalence of malaria  
86 and the associated risk factors among communities in various geographical settings in selected sites  
87 of southern Ethiopia.

## 88 **Materials and methods**

### 89 **Study areas**

90 This study was conducted in four zones namely South Omo, Gamo, Wolaita, and Hadiya of the  
91 SNNPRs. The Zones were selected purposefully based on malaria report. Benatsemay, Kucha,  
92 Boreda, Humbo, and Misirak Badawacho districts were recruited from the selected zones. Of  
93 districts, eight *kebeles* (smallest administrative units in Ethiopia); namely: Enchete, Duma, Dana,

94 Gocho Hambisa, Abaya Gurucho, Abaya Bilate, Mehal Korga, and Bashilo were selected (Fig 1).  
95 Average altitude of the study *kebeles* ranged from 553 m a. s. l at Duma to 1720m a. s. l. at Mehal  
96 Korga (Table 1). Malaria continues being a significant health problem in the region, but the  
97 transmission intensity varies across different local settings [15].

98 **Figure 1:** Map of Southern Nations Nationalities Regional State and study areas (made by Arc  
99 GIS version 10.1).

100 **Table 1:** Geographical location of the study *kebeles* in four Zones in the southern Ethiopia, January-  
101 June, 2019

| Zones     | District   | Study site    | Coordinates of study sites:<br>latitude, longitude | Average<br>altitude of<br>study sites (m) |
|-----------|------------|---------------|----------------------------------------------------|-------------------------------------------|
| South Omo | Benatsemay | Enchete       | 5°23.846"N, 36°58.339"E                            | 553                                       |
|           |            | Duma          | 5°20.522"N, 36°57.595"E                            | 557                                       |
| Gamo      | Kucha      | Dana          | 6°33.286"N, 37°34.247"E                            | 1292                                      |
|           | Boreda     | Gocho Hambisa | 6°32.057"N, 37°42.890"E                            | 1692                                      |
| Wolaita   | Humbo      | Abaya Gurucho | 6°36.814"N, 37°56.051"E                            | 1216                                      |
|           |            | Abaya Bilate  | 6°36.763"N, 37°57.671"E                            | 1205                                      |
| Hadiya    | Misirak    | Mehal Korga   | 7°05.135"N, 38°00.941"E                            | 1720                                      |
|           | Badawacho  | Bashilo       | 7°05.522"N, 38°00.951"E                            | 1718                                      |

## 102 **Study design**

103 Community based cross-sectional study was conducted between January and June in 2019 to  
104 determine prevalence of malaria infection and associated risk factors among household members  
105 in randomly selected localities in southern Ethiopia.

## 106 **Study participants**

107 People residing in all the study *kebeles* could be taken as source population and individuals in  
108 selected households were included as study participants based on the following inclusion and  
109 exclusion criteria.

## 110 **Inclusion and exclusion criteria**

111 All household members regardless of the age groups and sex who lived in the *Kebele* for at least 6  
112 months were included in the study. Individuals, who receiving malaria treatment during survey as  
113 well as non-consenting respondents were excluded.

## 114 **Sample size determination and sampling techniques**

115 The sample size was determined using single population proportion formula of Fink and Kosecoff  
116 [16] assuming, 16% expected prevalence [17], 2.5% margin error, design effect 2,  $\alpha=5%$  (95%  
117 confidence level), and 15% non-response rate. Accordingly, the calculated sample size was 1,674  
118 individuals. From the total sample size, the study participants were allocated proportionally based  
119 on entire population for each study site.

120 Multistage sampling technique was employed to sample study participants in the districts.  
121 According to Ethiopian population and housing census of 2007, average family size for the region  
122 was 4.9 [18]. Hence, the 1,674 individuals were calculated based on their population size and 342  
123 (1674/4.9) households were in 8 rural *kebeles* (Table 2).

124 Table 2: Sample size allocation to malaria prevalence study *kebeles* in four Zones in the southern  
125 Ethiopia, January-June, 2019

| <b>Zones</b> | <b><i>Kebeles</i></b> | <b>Total population</b> | <b>HH (Pop/ 4,9</b> | <b>Sample size allocation</b> | <b>No. of sampled HHs</b> |
|--------------|-----------------------|-------------------------|---------------------|-------------------------------|---------------------------|
| South        | Enchete               | 1934                    | 395                 | 140                           | 29                        |
| Omo          | Duma                  | 1607                    | 328                 | 116                           | 24                        |
| Gamo         | Dana                  | 2980                    | 608                 | 216                           | 44                        |

|              |               |              |             |             |            |
|--------------|---------------|--------------|-------------|-------------|------------|
|              | Gocho Hambisa | 3232         | 660         | 234         | 49         |
| Wolaita      | Abaya Gurucho | 3357         | 685         | 243         | 50         |
|              | Abaya Bilate  | 3351         | 684         | 243         | 50         |
| Hadiya       | Mehal Korga   | 3136         | 640         | 224         | 46         |
|              | Bashilo       | 3575         | 730         | 259         | 53         |
| <b>Total</b> |               | <b>23172</b> | <b>4729</b> | <b>1674</b> | <b>344</b> |

126 Key: HH =household

127 These households were included by employing a systematic random sampling technique, during  
128 sample collection, to obtain individual participants. The lists of households from health posts were  
129 used as sampling frames with an assumption of similar exposure to vector control interventions.  
130 The first household was selected randomly by lottery method and every  $k^{\text{th}}$  household was included  
131 in the study. Where K is calculated by the formula of  $K = \frac{N}{n}$ ,  $K = \frac{4729}{342}$ , Where, K= the gap between  
132 every household, N=total number of households in the study *kebeles* and n=sample size of  
133 households was calculated from individual sample size (Table 2). Therefore,  $K = 13$ , thus, every  
134 13<sup>th</sup>house hold was used to obtain individuals participants in the study *kebeles*. Each household was  
135 coordinated using geographical position system for geographical location.

## 136 **Sample collection and processing**

### 137 **Blood sample collection and processing**

138 Capillary blood sample was collected using sterile blood lancets from participants after obtaining  
139 consent during house-to-house visits. Blood sample collection was done by senior medical  
140 laboratory technicians, following standard guidelines [19]. Air dried blood smears were transported  
141 to nearby health centers' laboratories using slide boxes. The smears were fixed using 99.8%  
142 methanol, dried, and stained with a 10% Giemsa solution for 15 minutes. Then, microscopy was  
143 employed by experienced laboratory technicians to detect and identify plasmodium parasite species  
144 according to laboratory guidelines.

## 145 **Socio- demographic data collection**

146 Socio-demographic data were collected from 342 households based on structured questioner. The  
147 questioner prepared in local language was sought information on socio-demographic  
148 characteristics, and malaria prevention and control practices. After having the verbal consents, both  
149 individual and household-level factors associated with malaria transmission was obtained from the  
150 participant. During the time of sample collection, fever of study participants was checked and signs  
151 and symptoms of malaria such as headache, chills, sweating were asked. Fever of individuals was  
152 measured using thermometers.

## 153 **Data quality assurance**

154 Data quality was maintained using various approaches. First, training was given for field assistants  
155 (data collectors) to have a common understanding to collect the appropriate demographic  
156 information. Second, blood sample collection and microscopy were done by senior laboratory  
157 technologists and discussion was held to apply standard operational diagnostic procedures during  
158 laboratory work. Each questioner and the collected sample was cross-checked for completeness,  
159 accuracy, and consistency by the group members and corrective measures taken. Moreover, all  
160 houses were coordinated using geographical position system and study individuals were coded  
161 during blood sample collection. All positive slides and 10% of negative slides were re-examined  
162 by another senior laboratory technologist blinded to previous slide results. Slides were declared  
163 negative for plasmodium parasites after thorough examination of 100 fields and no plasmodium  
164 parasite is detected by microscopy.

## 165 **Study variables**

166 The outcome variable for examination of blood films was binary variables and indicated as positive  
167 or negative for plasmodium parasites.



168 Independent variables included house structure (the roof material, floor material, presence of visible  
169 holes on wall), IRS spraying in the last 12 months, LLINs ownership (presence of bed nets, total  
170 number of nets, access to LLINs and use of mosquito nets), presence of mosquito breeding site.  
171 The variables like sex, age, educational status and fever (auxiliary temperature) were considered as  
172 individual level for analysis of data.

## 173 **Data analysis**

174 Data was entered into Microsoft Excel spreadsheets and analyzed using SPSS version 20.0.  
175 Descriptive statistics were used to determine the frequencies of variables. Bivariate logistic  
176 regression analysis was conducted to examine the association between plasmodium infections with  
177 associated risk factors. Multivariate logistic regression analysis was conducted to test potential  
178 predictors' variable that was the main risk factor for malaria infection. The goodness of model fit  
179 was checked by Hosmer-Lemeshow-test and the logistic regression was fit for the test. Data  
180 normality was checked by non-parametric test of one-sample Kolmogorov-Smirnov test (1-sample  
181 K-S). During binary logistic regression if the  $p \leq 0.025$  was considered as a candidate for  
182 multivariate logistic regression. Thus, logistic regression statistical method of multivariate logistic  
183 regression was used with a 95% confidence interval and odds ratio was used to control confounders  
184 with the level of statistical significance was taken as  $P$ -value  $< 0.05$  for analysis of independent and  
185 outcome variables.

## 186 **Ethics approval**

187 The study was reviewed and approved by the Ethical Review Committee of Arba Minch University  
188 (Ref.No.CMHS/12033592/111). Prior to the study, permission letter was obtained from selected  
189 Zonal Health Departments. Consent was obtained and official letter was taken from the respective  
190 district's health office of the study *kebeles* administrators. The purpose of the study and procedure

191 of blood sample collection were explained to the participants. The participants' written and verbal  
192 consents were obtained from their parents/guardians of children and younger. The Study  
193 participants those positive for *P. falciparum* and *P. vivax* was treated free of charge at nearby health  
194 facilities.

## 195 **Results**

### 196 **Socio- demographic characteristics of the participants**

197 The socio-demographic characteristic of the study participants was summarized in Table 3. From  
198 the total of 1674 participants, 748 (44.1%) were males and 926 (54.5%) were female. With regard  
199 to the age, 346 (20.4%), 531 (31.7%) and 797 (44.5%) were in the age groups < 5, 5-14 and >14  
200 age groups, respectively. Of the total, 1638 (97.8%) were asymptomatic and the rest 13 (2.2%) were  
201 symptomatic cases.

202 Table 3: Socio-demographic characteristic of study participants by study *kebeles* in the southern  
203 Ethiopia, January-June 2019

| Characters     |               | Frequency<br>(n= 1674) | Percent |
|----------------|---------------|------------------------|---------|
| Sites          | Abaya Gurucho | 224                    | 13.2    |
|                | Abaya Bilate  | 181                    | 10.7    |
|                | Dana          | 272                    | 16.0    |
|                | Gocho Hambisa | 268                    | 15.8    |
|                | Enchete       | 163                    | 9.6     |
|                | Duma          | 126                    | 7.4     |
|                | Mehal Korga   | 214                    | 12.6    |
|                | Bashilo       | 226                    | 13.3    |
| Sex            | Male          | 748                    | 44.1    |
|                | Female        | 926                    | 54.5    |
| Marital status | Single        | 1121                   | 66.9    |
|                | Married       | 541                    | 32.3    |
|                | Divorced      | 1                      | 0.1     |
|                | Widowed       | 11                     | 0.7     |

|             |          |      |      |
|-------------|----------|------|------|
| Age (years) | <5       | 346  | 20.7 |
|             | 5-14     | 531  | 31.7 |
|             | 15-49    | 797  | 47.6 |
| Family size | ≤5       | 82   | 24.0 |
|             | >5       | 260  | 76.0 |
| Symptoms    | Absence  | 1638 | 97.8 |
|             | Presence | 36   | 2.2  |

## 204 Prevalence of malaria

205 The overall prevalence of malaria was 4.5% (76/1674) confirmed by microscopy (Table 4). The  
 206 plasmodium infection was more prevalent in Bashilo *kebele* 14.6% (33/226) followed by Mehal  
 207 Korga 12.1% (26/214). Plasmodium infection was detected in seven study *kebeles* and no malaria  
 208 cases were detected in Gocho Hambisa *kebele*.

209 Table 4: Prevalence of plasmodium species in eight *kebeles* of the southern Ethiopia, January-June  
 210 2019.

| Zones            | Kebeles       | Total examined (N) | Plasmodium species         |                       |                       | Total Prevalence (%) |
|------------------|---------------|--------------------|----------------------------|-----------------------|-----------------------|----------------------|
|                  |               |                    | <i>P. falciparum</i> n (%) | <i>P. vivax</i> n (%) | Mixed infection n (%) |                      |
| South Omo        | Enchete       | 163                | 3 (1.84)                   | 1 (0.61)              | -                     | 4 (2.5)              |
|                  | Duma          | 126                | 1 (0.79)                   | -                     | -                     | 1 (0.8)              |
| Gamo             | Dana          | 272                | 6 (2.21)                   | 1 (0.37)              | -                     | 7 (2.6)              |
|                  | Gocho Hambisa | 268                | -                          | -                     | -                     | -                    |
| Wolaita          | Abaya Gurucho | 224                | 1 (0.44)                   | 1 (0.44)              | -                     | 2 (0.9)              |
|                  | Abaya Bilate  | 181                | 1 (0.55)                   | 2 (1.10)              | -                     | 3 (1.7)              |
| Hadiya           | Mehal Korga   | 214                | 15 (7.01)                  | 8 (3.74)              | 3 (1.40)              | 26 (12.1)            |
|                  | Bashilo       | 226                | 23 (10.18)                 | 1(0.44)               | 9 (3.98)              | 33 (14.6)            |
| <b>Total (%)</b> |               | <b>1674</b>        | <b>50 (3)</b>              | <b>14 (0.8)</b>       | <b>12 (0.7)</b>       | <b>76 (4.5)</b>      |

## 211 Identification of plasmodium species

212 Among the confirmed malaria cases, *P. falciparum* was dominant species accounting 65.8%  
213 (50/76), while *P. vivax* was 18.4% (14/76). Mixed infections with *P. falciparum* and *P. vivax* were  
214 accounted 15.8% (12/76). Higher prevalence of *P. falciparum* 10.18% (23/226) was observed in  
215 Bashilo kebele. Among study kebeles, Mehal Korga had the high prevalence of *P. vivax* 3.74%  
216 (8/214) (Table 4).

## 217 **Sex and age-related prevalence of malaria**

218 Of the study participants, 5.2% (39/748) males and 4% (37/926) females were found positive for  
219 plasmodium parasite (Table 5). The prevalence of plasmodium parasites among age groups were  
220 7.8% (27/346) in under five children, 7.5% (40/531) in 5-14 years and 1.1 (9/797) in >14 years.  
221 The greatest malaria prevalence was observed among under five children followed by school age  
222 groups.

223 Table 5: Sex and age-related prevalence of malaria in study setting of the southern Ethiopia,  
224 January-June 2019

| Variables |        | Study Participants | Malaria positive cases | Percentage (%) |
|-----------|--------|--------------------|------------------------|----------------|
| Sex       | Male   | 748                | 39                     | 5.2            |
|           | Female | 926                | 37                     | 4.0            |
| Age       | <5     | 346                | 27                     | 7.8            |
|           | 5-14   | 531                | 40                     | 7.5            |
|           | >14    | 797                | 9                      | 1.1            |

225

## 226 **Associated risk factors for malaria**

227 A total of nine independent variables were considered for bivariate logistic regression analysis of  
228 individuals and household associated risk factors for plasmodium parasite infections (Table 6). The  
229 variables associated with individual and household-level risk factors of plasmodium parasite

230 infection were age, fever during survey time, marital status, LLINs utilization, IRS spray status,  
231 house structure (main roof material), main wall material, presence of visible hole on the wall, and  
232 living proximity to breeding sites. Among those variables, the age of individuals, marital status,  
233 fever, LLINs utilization and living proximity to the breeding site were a candidate for multivariate  
234 analysis.  
235

236 Table 6: Risk factors of plasmodium infection in the study localities in southern Ethiopia, January and June, 2019

| Variables         |              | Category |            | Binary logistic |       |            | Multivariate logistic |      |           |
|-------------------|--------------|----------|------------|-----------------|-------|------------|-----------------------|------|-----------|
|                   |              | +ve(%)   | -ve (%)    | P-value         | COR   | CI         | P-value               | AOR  | CI        |
| Age               | <5           | 27(7.8)  | 319(92.2)  |                 |       |            |                       |      |           |
|                   | 5-14         | 40(7.0)  | 532(92.5)  | 0.89            | 0.97  | 0.58-1.60  | 0.83                  | 1.08 | 0.54-2.14 |
|                   | >14          | 9(1.2)   | 747(98.9)  | 0.001*          | 0.14  | 0.07-0.31  | 0.029*                | 0.14 | 0.02-0.82 |
| Marital Status    | Single       | 68(89.5) | 1065(66.6) | 0.001*          | 0.24  | 0.11-0.49  | 0.51                  | 1.83 | 0.3-11.9  |
|                   | Married      | 8(10.5)  | 533(33.4)  |                 |       |            |                       |      |           |
| Fever             | No           | 53(3.2)  | 1585(96.8) |                 |       |            |                       |      |           |
|                   | Yes          | 23(63.9) | 13(36.1)   | 0.001*          | 53.93 | 25.9-112.4 | 0.001*                | 28.4 | 11.4-70.6 |
| LLINs Utilization | No           | 39(7.4)  | 487(92.8)  |                 |       |            |                       |      |           |
|                   | Yes          | 37(3.2)  | 1111(96.8) | 0.001*          | 0.43  | 0.27-0.68  | 0.003*                | 0.37 | 0.19-0.72 |
| IRS Spray         | No           | 46(5.2)  | 837(94.8)  | 0.166           | 0.72  | 0.45-1.15  | 0.06                  | 0.52 | 0.26-1.03 |
|                   | Yes          | 30 (3.8) | 761(96.2)  |                 |       |            |                       |      |           |
| Roofing           | Corrugated   | 28 (3.8) | 710(96.2)  | 0.195           | 1.37  | 0.85-2.21  | 0.23                  | 0.66 | 0.33-1.31 |
|                   | Thatched     | 48 (5.1) | 888(94.9)  |                 |       |            |                       |      |           |
| Wall              | Wood         | 5 (1.4)  | 290(98.6)  | 0.89            | 0.86  | 0.09-7.78  | 0.47                  | 0.40 | 0.03-4.78 |
|                   | Wood and mud | 70 (5.4) | 1246(94.6) | 0.21            | 3.53  | 0.48-25.8  | 0.39                  | 2.46 | 0.31-19.3 |
|                   | Wood cement  | 1(1.6)   | 62(8.4)    | 1               |       |            |                       |      |           |
| Visible wall hole | No           | 42(5.4)  | 733(94.6)  |                 |       |            |                       |      |           |
|                   | Yes          | 34(3.8)  | 861(96.2)  | 0.12            | 0.69  | 0.43-1.10  | 0.63                  | 0.85 | 0.44-1.64 |
| Breeding site     | No           | 12(2.0)  | 578(98.0)  |                 |       |            |                       |      |           |
|                   | Yes          | 64(5.9)  | 1020(94.1) | 0.005*          | 2.6   | 1.34-5.05  | 0.001*                | 6.17 | 2.66-14.3 |

238 In the multivariate logistic regression analysis, the predictors of plasmodium infections after  
239 controlling confounders of the variables were the age of individuals (AOR=0.14, 95% CI 0.02-  
240 0.82) and fever during survey time (AOR= 0.37, 95% CI 0.19-0.72). Household-level predictor  
241 variables of plasmodium infections were LLINs utilization (AOR=0.37, 95% CI 0.19-0.72) and  
242 proximity mosquito breeding sites (AOR=6.17, 95% CI 2.66-14.3) were a significant association  
243 with plasmodium infection.

244 The individuals who's aged <5 was 86% more likely to have a malaria as compared with  
245 individuals whose age >14 with the p-value =0.029 (IC=0.02-.82). Individuals who do not have a  
246 fever during study time were 28.4 times more likely have plasmodium parasite as compared to  
247 individuals with fever with the p-value=0.001 (CI=11.4-70.06).

248 LLINs utilization was significantly associated with plasmodium species. The individuals that have  
249 not to use LLINs during a sleeping time were 63% more likely have a chance to plasmodium  
250 parasite infection as compared with their counterparts with the p-value=0.003 (CI=0.19-0.72)  
251 (Table 6). Those individuals who live proximity to the breeding site were 6.17 times more likely  
252 have a chance to develop malaria as compared to individuals do not live around breeding site with  
253 the p-value=0.001 (CI=2.66-14.3).

## 254 **Discussion**

255 Malaria affects the lives of almost all people living in sub-Saharan African countries. In Ethiopia,  
256 malaria remains a major public health problem despite continuous control and preventive strategies  
257 in place. The overall prevalence of malaria infection in this study was 4.5% with varying  
258 prevalence in different study sites in southern Ethiopia. Both *P. falciparum* and *P. vivax* has been  
259 identified with *P. falciparum* dominant species accounted for 65.8% (50/76). It was also observed

260 that lower age group, asymptomatic case, individuals who live proximity to mosquito breeding site  
261 had higher plasmodium infection.

262 The overall prevalence of plasmodium infection in this study (4.5%) was in line with reports from  
263 various parts of Ethiopia including 4.4% in Butajira, 6.1% in Benatsemay district (South Omo),  
264 6.7% in Dembia districts, 6.8% in Sanja town, and 4% in Jimma zone [20-23]. This finding is  
265 higher than the prevalence reported in another study in Butajira and national malaria indicator  
266 survey 2015 result, with prevalence of 0.9% and 0.5%, respectively [24, 25]. On the other hand,  
267 the present finding is much lower than the prevalence reported in Kisumu country in the Kenya  
268 with 28% [26], Armachiho districts, North West Ethiopia with 18.4% [27], and Dilla town and  
269 surrounding areas with 16.0% [17]. The difference in findings might be associated with  
270 sociodemographic, socioeconomic and environmental factors that could affect the epidemiology  
271 of malaria such as altitude, proximity to mosquito breeding sites, housing condition, ownership  
272 and utilization of LLINs among others.

273 Prevalence of malaria infection was relatively high in Bashilo (14.6%) and Mehal Korga *kebeles*  
274 (12.6%) were observed compared to other study areas. The study conducted different parts in  
275 Ethiopia showed that the prevalence of plasmodium infection was different among study  
276 participants [20, 28, 29]. In the study areas, heterogeneity of plasmodium infection in the study  
277 settings in the local community was existed. The reason is why because of ecologic and  
278 environmental factors, host and vector characteristics, social, biological and socio- demographic  
279 factors in the study areas.

280 *Plasmodium falciparum* and *P. vivax* were identified as co-endemic species in study areas while  
281 *P. falciparum* was dominant species of parasite. The dominance of *P. falciparum* was consistent  
282 with the study conducted in Benatsemay districts in south Omo, Ethiopia [23]. In addition, the  
283 national community-based malaria indicator surveys conducted during peak malaria transmission



284 season in the 2007 and 2011 reported the dominance of *P. falciparum* as 83% and 77%,  
285 respectively [30,31]. The dominance of *P. falciparum* species might be more widely distributed in  
286 many parts of Ethiopia. This might be associated to the capacity of *P. falciparum* parasite to  
287 develop resistance against anti-malarial drugs represents a central challenge in the global control  
288 and elimination of malaria [32]

289 In contrast to this finding, other studies conducted in different geographical settings in Ethiopia  
290 [28,29] monitoring changing of the epidemiology of malaria beyond Gark projects [33] and the  
291 facility-based cross-sectional study in Hadiya Zone [34] the *P. vivax* dominates over *P. falciparum*.  
292 One possible reason for predominance of *P. vivax* might be improper management of primaquine  
293 that lead to the relapse of hyponozoites.

294 Regarding the age groups, the likelihood of having higher malaria cases was found among under  
295 five children and school age children than other age groups. The finding of this line with malaria  
296 prevalence in Ethiopian malaria indicator survey [25], the study conducted in Arba Minch Zuria  
297 district [35] children this age groups are more vulnerable and had have plasmodium parasite  
298 infections. The reason why high malaria cases in the age groups, the children of these age groups  
299 are somewhat more risk groups due to immunity status, exposed to mosquito bites, and less  
300 attention of care for utilization of malaria preventive measures.

301 Asymptomatic malaria infection was common in endemic areas. In malaria-endemic areas, people  
302 may develop partial immunity, allowing the asymptomatic infection to occur. The odds of  
303 plasmodium infection were higher on individuals those do not show symptoms (fevers) than the  
304 symptomatic cases in the study site. The result consistent with the study conducted in Senegal that  
305 indicated *P. falciparum* was dominant species in asymptomatic cases [36]. In other way, in low  
306 transmission settings, asymptomatic cases are common and most of the asymptomatic infections  
307 are sub-microscopic [28,37]. Study showed that asymptomatic cases could serve as reservoirs of

308 infections to the mosquito vectors [38], Thus, they could serve as a major source of gametocytes  
309 and contributed to residual transmissions of malaria as asymptomatic carriers do not visit health  
310 facility for treatment. In many countries *P. falciparum* is asymptomatic or sub-clinical. In very  
311 low transmission settings, sub-microscopic carriers may contribute up to 50 % of humans to  
312 mosquito transmission [39].

313 Appropriate use of the utilization of LLINs is one of the key interventions for the prevention of  
314 malaria [40]. In this study, ownership of LLINs was 76.9%. This finding was higher than the  
315 previous findings in Hadiya zones with LLINs ownership of 41.6% [34]. On the other hand,  
316 national malaria indicator survey conducted in 2011 and 2015 showed 55 % and 64% of  
317 households have at least one LLINs of any type [25,30] and a community-based cohort study in  
318 South Central Ethiopia [41]. However, the accesses to LLINs were not significantly associated  
319 with plasmodium infection in study sites.

320 The utilizations of LLINs have an association with malaria cases among study participants. The  
321 current study showed that participants who use LLINs had lower malaria cases than those do not  
322 use. This findings in line with the study conducted Dilla and surroundings areas, Dembia districts,  
323 and Hadiya zones where participants do not use bed nets were 0.2, 0.2 and 4.6 times more likely  
324 developed plasmodium parasite infections, respectively [17,22,34]. The finding speculates the  
325 proper usage of LLINs protects from malaria through protecting mosquito bites depending on  
326 biting activity. It is noticeable that the proper utilization of LLINs will prevent mosquito that in  
327 turn prevent plasmodium parasite infection. These findings might the implication of possession  
328 and efficacy of LLINs utilization in the community and less attention to frequent utilization in  
329 different local settings.

330 Another important factor that determines the odds of plasmodium infection is living proximity to  
331 the breeding site. In this study, a participant who live proximity to mosquito breeding sites was at

332 high risk of plasmodium infections. The study participants those lives proximity to the stagnant  
333 water of mosquito the breeding sites 6.17 times more likely have a chance to develop plasmodium  
334 infection as compared to individuals do not live around the breeding site. This finding in agreement  
335 with the study conducted in Dilla and surrounding areas and Dembia districts [17,22] by increasing  
336 the probability of having plasmodium infection. This is because proximity mosquito breeding sites  
337 give more chances to exposure mosquito bites in the community. It is fact that environmental  
338 management is important measures to prevent mosquito breeding sites to reduce malaria  
339 transmission.

340 Our study has some limitations. One of the limitations of this study is the laboratory diagnosis  
341 which is limited to microscopy only, a low sensitive tool. We were not able to determine the  
342 temporal relationship of disease as the study design is cross-sectional. The community-based  
343 nature of the study can be viewed as one of the strengths of this study as it enables us to screen the  
344 asymptomatic cases who could serve as potential reservoir of malaria parasite. High response rate  
345 of study participants can also be viewed as another strength of this study.

## 346 **Conclusions**

347 Malaria is still important public health problems, although the prevalence of disease was varying  
348 in the study sites. Lower age children were at higher risk of plasmodium infection and more  
349 asymptomatic cases. Thus, malaria prevention and control strategies addressing lower age children  
350 and asymptomatic cases should be in place to reduce malaria associated morbidity and mortality  
351 in the study localities.

352 **Competing interest:** no interest

## 353 **Author's contributions**

354 Conceptualization the gap: Girma Yutura, Fekadu Massebo, Nigatu Eligo, Teklu Wegayehu

355 Data accusation and management: GirmaYutura, Nigatu Eligo

356 Data analysis and write up: Girma Yutura, Fekadu Massebo, Abena Kochora, Teklu Wegayehu

357 Review and editing: Girma Yutura, Fekadu Massebo, Teklu Wegayehu

### 358 **Acknowledgements**

359 We would like to thank all the health centers and laboratory technicians of study sites for their  
360 cooperation during sample collection and processing. We are also grateful to South Omo, Gamo,  
361 Wolaita and Hadiya zonal and districts health departments and *Kebele* administrators for their  
362 technical support. Study participants are acknowledged for taking parts in the study and we would  
363 like to thank Arba Minch University for its financial and technical support.

### 364 **Reference**

- 365 1. World Health Organization (WHO). World Malaria Report: 2018. Geneva, Switzerland, 2018.
- 366 2. World Health Organization (WHO). World Malaria Report: 2021: Geneva, Switzerland, 2022.
- 367 3. World Health Organization (WHO). World malaria report: 2016. Geneva, Switzerland, 2019.
- 368 4. World Health Organization (WHO). Global Malaria Programme, Geneva, Switzerland, 2013
- 369 5. World Health Organization (WHO). World malaria report: 2017. Geneva , Switzerland, 2017.
- 370 6. World Health Organization (WHO). World Health Statistics 2016: Monitoring Health for the  
371 SDGs Sustainable Development Goals. Geneva, Switzerland, 2016.
- 372 7. Fedral Minstry of Health (FMoH). National strategic plan for malaria prevention, control and  
373 elimination in Ethiopia, 2011-2015. AddisAbaba. Accessed at  
374 <http://www.nationalplanningcycles.org>. Addis Abab: 2010.
- 375 8. Carter Center. Annual malaria control program review enhancing impact through integrated  
376 strategies malaria programs Ethiopia and Nigeria. Atlanta, Georgia. 2012.

- 377 9. Yewhalaw D, Legesse W, Bortel WV, GebreSelassie S, Kloos H, Duchateau L, et al. Malaria  
378 and water resource development: the case of Gilgel-Gibehydroelectric dam in Ethiopia. *Malar*  
379 *J.* 2009; 8 (21).
- 380 10. Ketema TG and Bacha K. Therapeutic efficacy of chloroquine for treatment of *Plasmodium*  
381 *vivax* malaria cases in Halaba district, South Ethiopia. *Parasit Vectors.* 2011; 4(46).
- 382 11. Fedral Minstry of Health (FMoH). Ethiopia Malaria Elimination Strategic Plan: 2021-2025 ,  
383 Addis Ababa, Ethiopia. August 2020.
- 384 12. Fedral Minstry of Health (FMoH). Federal Democratic Republic of Ethiopia, National Strategic  
385 Plan for Malaria Prevention, Control and Elimination in Ethiopia 2011–2015, Addis Ababa,  
386 Ethiopia. 2010.
- 387 13. Fedral Minstry of Health (FMoH). Federal Democratic Republic of Ethiopia, Health Sector  
388 Transformation Plan: 2015/16-2019/20, Federal Ministry of Health, addis Ababa, Ethiopia.  
389 2015.
- 390 14. Health bureau (HB). South Nations, Nationalities and People’s Region Health Bureau Malaria  
391 Annual Report EFY 2007. Hawassa, Ethiopia. 2015.
- 392 15. Loha E and Lindtjørn B. Model variation in predicting incidence of *Plasmodium falciparium*  
393 malaria using 1998-2007 morbidity and metereological data from South Ethiopia. *Malar J.*  
394 2010; 9 (166).
- 395 16. Fink AKJ. How to Conduct Surveys: A Step by Step Guide. Thousand Oaks, Calif: Sage  
396 Publications. 1995.
- 397 17. Molla E and Ayele B. Prevalence of Malaria and Associated Factors in Dilla Town and the  
398 Surrounding Rural Areas, Gedeo Zone, Southern Ethiopia. *J Bacteriol Parasitool.* 2015; 5(6):  
399 242.

- 400 18. Central Statistical Agency (CSA). Central Statistics Agency (2007). 2007 Population and  
401 housing census of Ethiopia. Central Statistical Authority, Addis Ababa, Ethiopia: 2007.
- 402 19. World Health Organization (WHO). Basic malaria microscopy –Part I: Learner's guide. Second  
403 edition: 2010. available at accessed at <https://www.who.int/malaria> .
- 404 20. Zemene E, Koepfli C, Tiruneh A, Yeshiwondim AK, Seyoum D, Lee MC, et al. Detection of  
405 foci of residual malaria transmission through reactive case detection in Ethiopia. *Malar J.*  
406 2018;17(390).
- 407 21. Tesfaye S, Belyhun Y, Teklu T, Mengesha T and Petros B. Malaria prevalence pattern observed  
408 in the highland fringe of Butajira, Southern Ethiopia: A longitudinal study from parasitological  
409 and entomological survey. *Malar J.* 2011; 10(153).
- 410 22. Fekadu M, Yenit MK and Lakew AA M. The prevalence of asymptomatic malaria parasitemia  
411 and associated factors among adults in Dembia district, northwest Ethiopia, 2017. *Arch Public*  
412 *Health.* 2018; 76(74).
- 413 23. Debo GW and Kassa DH. Prevalence of malaria and associated factors in Benna Tsemay  
414 district of pastoralist community, Southern Ethiopia. *Travel Med Vacc.* 2016; 2(16).
- 415 24. Woyessa A, Deressa W, Ali A and Lindtjørn AB. Prevalence of malaria infection in Butajira  
416 area, south-central Ethiopia. *Malar J.* 2012; 11(84).
- 417 25. Ethiopia National Malaria Indicator Survey (EMIS). Ethiopia National Malaria Indicator  
418 Survey 2015. Addis Ababa, Ethiopia. Ethiopian Public Health Institute. 2016.
- 419 26. Jenkins R, Omollo R, Ongecha M, Sifuna P, Othieno C, Ongeri L, et al. Prevalence of malaria  
420 parasites in adults and its determinants in malaria endemic area of Kisumu County, Kenya.  
421 *Malar J.* 2015; 14(26).

- 422 27. Aschale Y, Mengist A, Bitew A, Kassie B and Talie A. Prevalence of malaria and associated  
423 risk factors among asymptomatic migrant laborers in Armachiho District, Northwest Ethiopia.  
424 Res Rep Trop Med. 2018; 9:95–101.
- 425 28. Tadesse FG, Slater HC, Chali W, Teelen K, Lanke K, Belachew M, et al. The Relative  
426 Contribution of Symptomatic and Asymptomatic *Plasmodium vivax* and *Plasmodium*  
427 *falciparum* Infections to the Infectious Reservoir in a Low-Endemic Setting in Ethiopia. Clin  
428 Infect Dis. 2018; 66(12):1883.
- 429 29. Haji Y, Fogarty AW and Deressa W. Prevalence and associated factors of malaria among  
430 febrile children in Ethiopia: A cross-sectional health facility-based study. Acta Tropica. 2015;  
431 155: 63–70.
- 432 30. Ethiopia National Malaria Indicator Survey (EMIS). Ethiopia National Malaria Indicator  
433 Survey 2011: Technical Summary. Addis Ababa. : The Ethiopian Health and Nutrition  
434 Research Institute & Partners. 2012.
- 435 31. Ethiopia National Malaria Indicator Survey (EMIS). Ethiopian National Malaria Indicator  
436 Survey (2007). Addis Ababa: Technical Summary Ethiopian, 2008.
- 437 32. Gil JP and Fançonny C. *Plasmodium falciparum* Multidrug Resistance Proteins (pfMRPs). Front  
438 Pharmacol. 2021; (12) 759422.
- 439 33. Abeku TA, Helinski ME, Kirby JM, Kefyalew T, Awano T, Batisso E, et al. Monitoring  
440 changes in malaria epidemiology and effectiveness of interventions in Ethiopia and Uganda:  
441 Beyond Garki Project baseline survey. Malar J. 2015; 14(337):3673-8635.
- 442 34. Delil R, Dileba, TK, Habtu YA, Gone T. and Leta TJ. Magnitude of Malaria and Factors among  
443 Febrile Cases in Low Transmission Areas of Hadiya Zone, Ethiopia: A Facility Based  
444 CrossSectional Study. PLoS ONE. 2016; 5(11).

- 445 35. Abose T, Ye Y, Olana D, Alamirew D, Beyene Y, Regassa L, et al. Re-orientation and  
446 definition of the role of malaria vector control in Ethiopia: the epidemiology and control of  
447 malaria with special emphasis on the distribution, behaviour and susceptibility of insecticides  
448 of anopheline vectors and cloroquine resistance in Zwai, Central Ethiopia and other areas  
449 Geneva: World Health Organization Division of of control of Tropical disease published. 1998.
- 450 36. Niang M, Thiam LG, Sane R, Diagne N, Tall C, Doucoure S, et al. Substantial asymptomatic  
451 submicroscopic Plasmodium carriage during dry season in low ransmission areas in Senegal:  
452 Implicationsfor malaria control and elimination. PLoS ONE, . 2017; 12(8).
- 453 37. Federal Ministry of Health (FMOH). Annual Performance Report 2015 (HSDP IV) for EFY  
454 2007 (2014/15) version 1. Addis abeba, Ethiopia. 2015.
- 455 38. Kiattibutr K, Roobsoong W, Sriwichai P, Saeseu T, Rachaphaew N, Suansomjit C, et al.  
456 Infectivity of symptomatic and asymptomatic *Plasmodium vivax* infections to a Southeast  
457 Asian vector, Anopheles dirus. Int J Parasitol. 2017; 47(2-3):163–70.
- 458 39. Chen I, Clarke SE, Gosling R, Hamainza B, Killeen G, Magill A, et al. “Asymptomatic”  
459 malaria: a chronic and debilitating infection that should be treated. PLoS Med. 2016; 13(1).
- 460 40. Fedal minstry of Health (FMOH). National Malaria Guidelines. 3<sup>rd</sup> ed. accessed at  
461 [www.medbox.org](http://www.medbox.org). Addis Abeba, Ethiopia. 2012.
- 462 41. Solomon T, Loha E, Deressa W, Gari T, Overgaard HJ. and Lindtjørn. Low use of long-lasting  
463 insecticidal nets for malaria prevention in south-central Ethiopia: A community-based cohort  
464 study. PLoS ONE. 2019; 14(1).



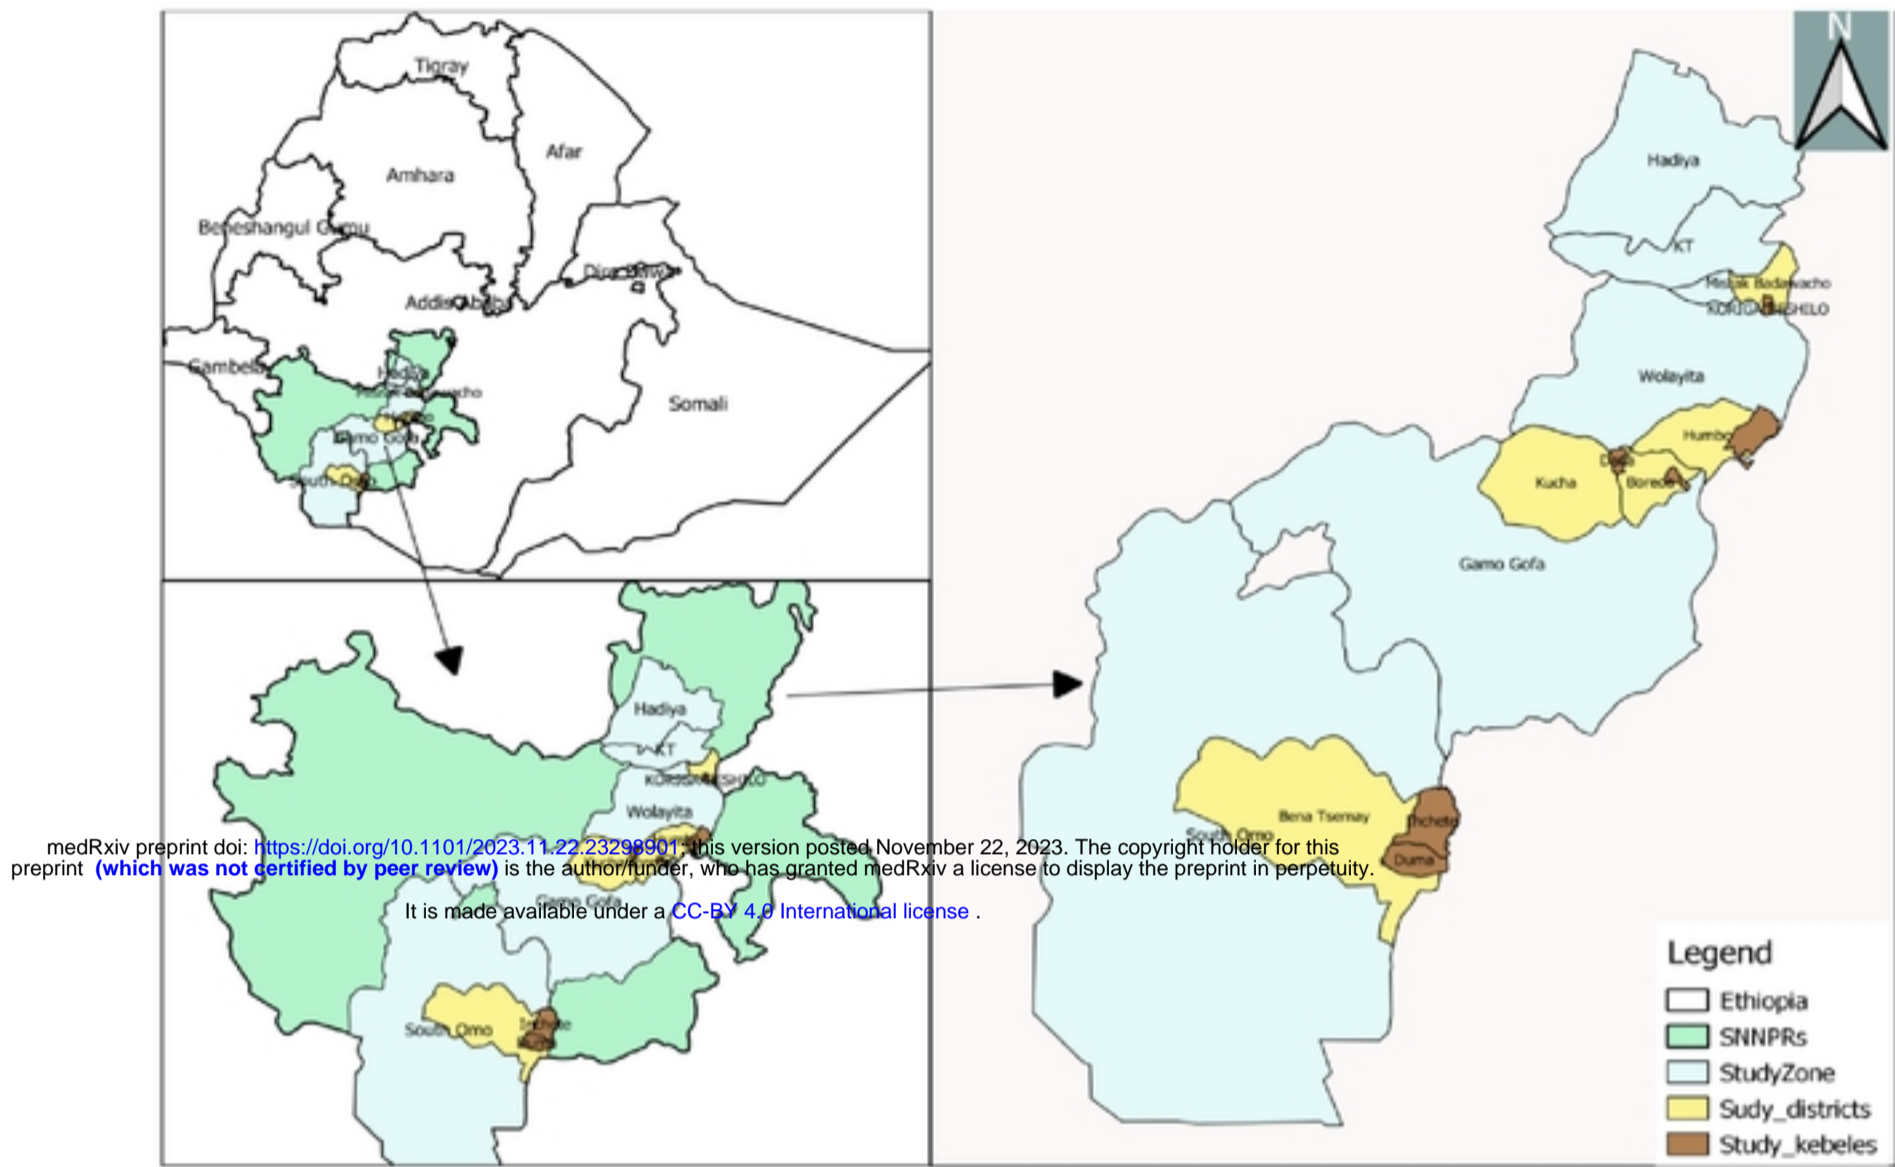

**Figure 1: Map of Southern Nations Nationalities Regional State and study areas (made by Arc GIS version 10.1).**
